# Supplementary material
Source: publisher figshare collection journal article supplement (https://acs.figshare.com/ndownloader/files/10486819)
Supplement: Supplementary file 1 [file 10486819]

# Supporting Information

## A Rational Design for Enhanced Catalytic Activity and Durability: Strongly Coupled N-doped $\text{CrO}_x/\text{Ce}_{0.2}\text{Zr}_{0.8}\text{O}_2$ Nanoparticle Composites

*Wei Cai,<sup>†,‡,\*</sup> Qin Zhong,<sup>§,\*</sup> Dongyu Wang,<sup>§</sup> Yunxia Zhao,<sup>‡</sup> Mindong Chen,<sup>‡</sup> Yunfei Bu,<sup>‡,§,\*</sup>*

<sup>†</sup> Key Laboratory of Meteorological Disaster, Ministry of Education, Joint International Research Laboratory of Climate and Environment Change, Collaborative Innovation Center on Forecast and Evaluation of Meteorological Disasters, Nanjing University of Information Science & Technology, Nanjing, 210044, China

<sup>‡</sup> Jiangsu Collaborative Innovation Center of Atmospheric Environment and Equipment Technology, School of Environmental Science and Engineering, Nanjing University of Information Science & Technology, Nanjing, 210044, China

<sup>§</sup> School of Chemical and Engineering, Nanjing University of Science and Technology, Nanjing, 210094, China

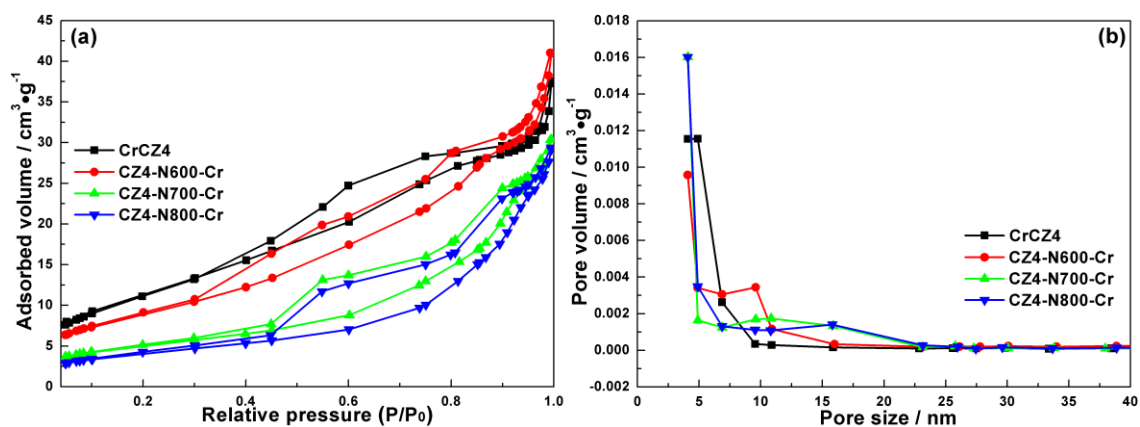

**Figure S1.**  $N_2$  adsorption-desorption isotherms (a) and pore size distributions (b) of the CrCZ4 and CZ4-N(x)-Cr catalysts.

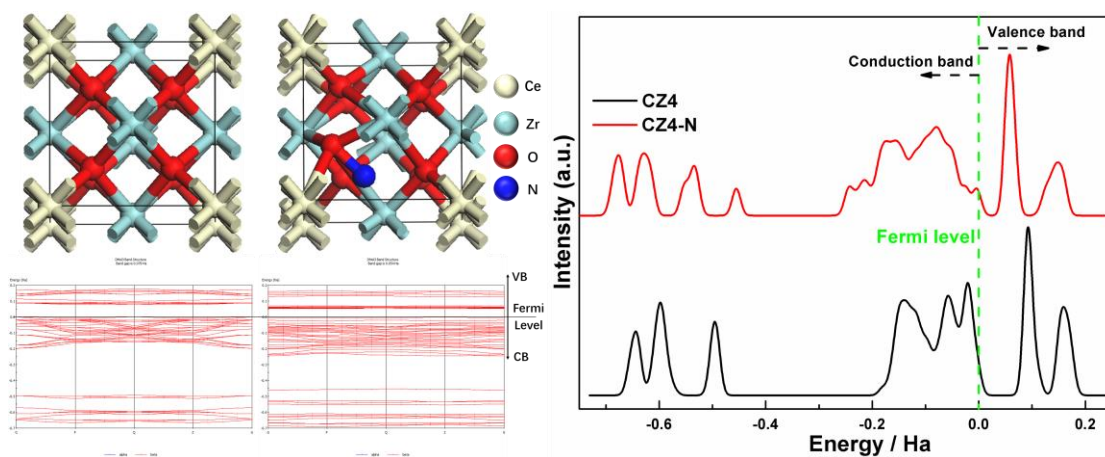

**Figure S2.** Theoretical calculation on the band structure of CZ4 and N-doped CZ4 samples.

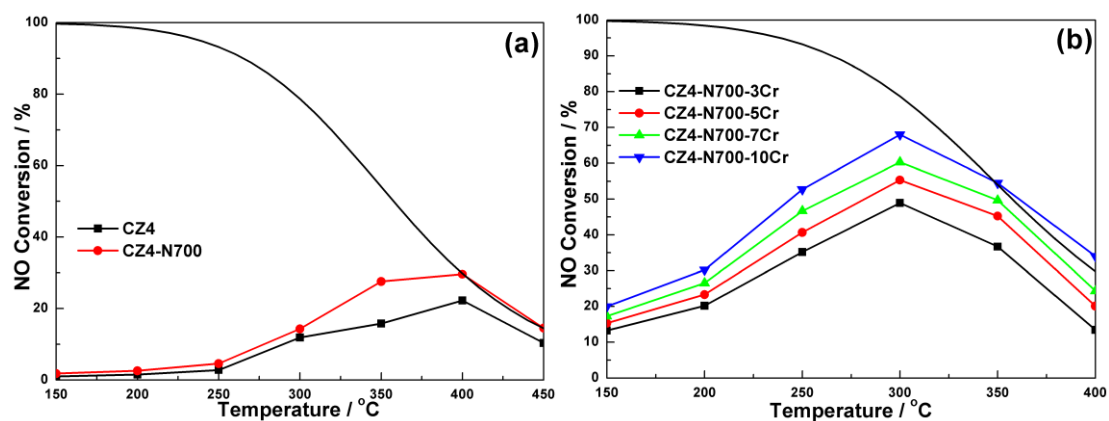

**Figure S3.** Catalytic oxidation of NO over the CZ4 and CZ4-N700 support (a) and CZ4-N700- $x$ Cr ( $x=3, 5, 7, 10$ ) series catalysts (b).

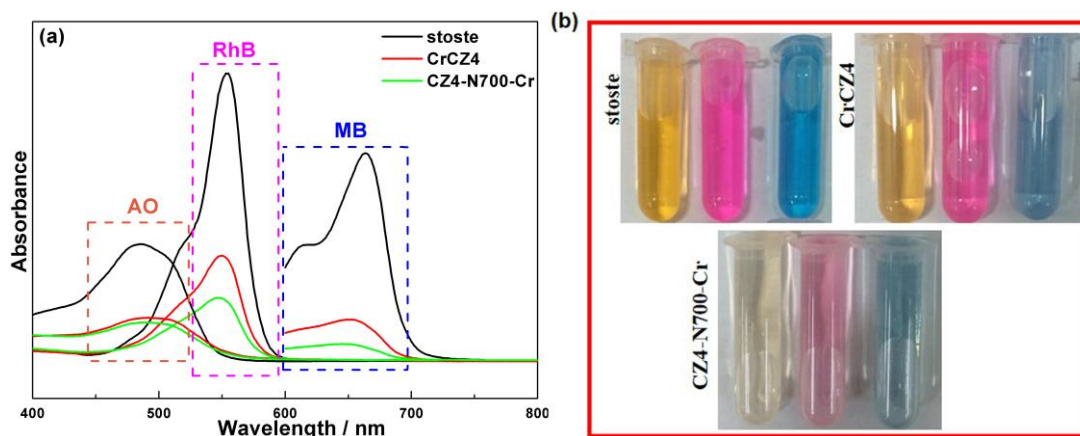

**Figure S4.** Photodegradation profiles (a) and visual pictures (b) of acid orange (AO), rhodamine B (RhB) and methylene blue (MB) over the CrCZ4 and CZ4-N700-Cr catalysts.

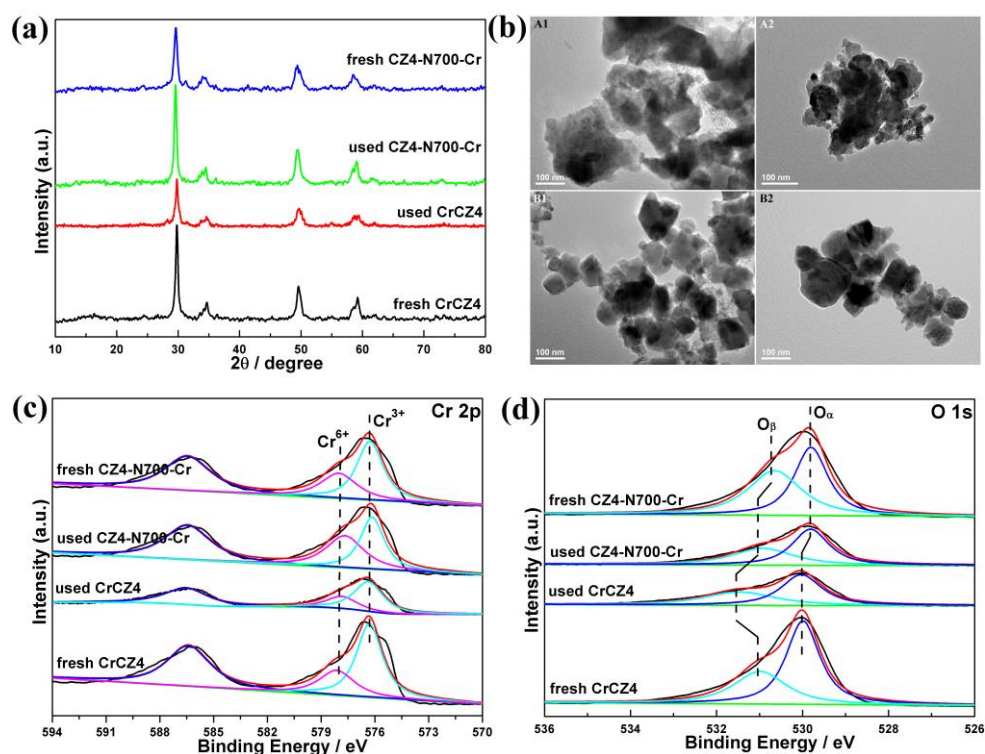

**Figure S5.** XRD patterns (a), TEM images (b), Cr 2p (c) and O 1s (d) XPS spectra of the fresh (A1&B1) and used (A2&B2) CrCZ4 (A1&A2) and CZ4-N700-Cr (B1&B2) catalysts.

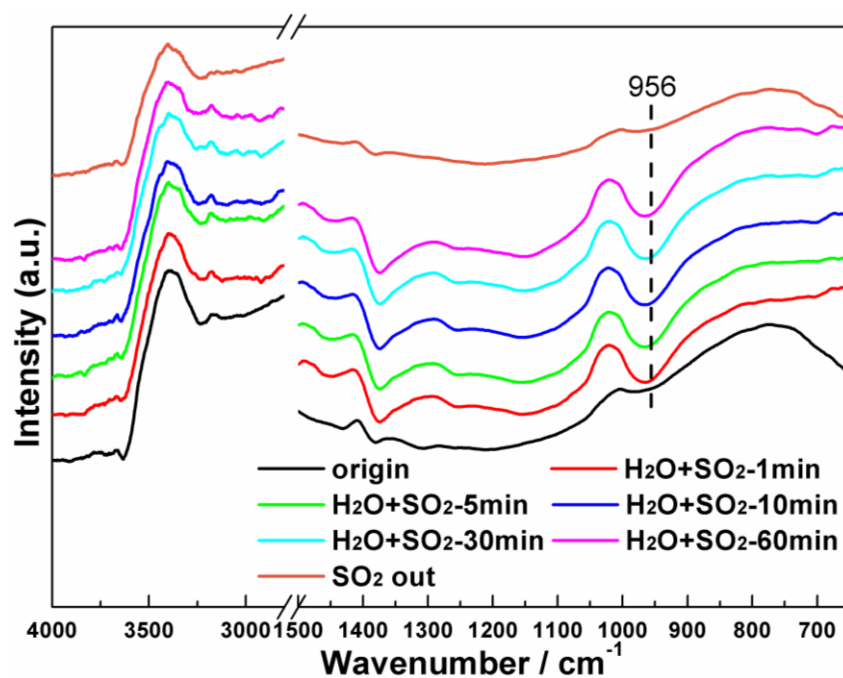

**Figure S6.** *In situ* DRIFTS spectra of CZ4-N700-Cr upon exposure to 500 ppm NO, 8 vol.% O<sub>2</sub>, 6 vol.% H<sub>2</sub>O and 400 ppm SO<sub>2</sub> at 250 °C for various times.

**Table S1.** XPS elementary cation surface concentration of the fresh and used CrCZ4 and CZ4-N700-Cr catalysts.

| Samples           | Cation ratios                               |                                                         |
|-------------------|---------------------------------------------|---------------------------------------------------------|
|                   | $\text{Cr}^{6+}/\text{Cr}_{(\text{total})}$ | $\text{O}_{\beta}/(\text{O}_{\alpha}+\text{O}_{\beta})$ |
| fresh-CrCZ4       | 31.7%                                       | 38.0%                                                   |
| used-CrCZ4        | 30.7%                                       | 36.2%                                                   |
| fresh-CZ4-N700-Cr | 37.1%                                       | 51.1%                                                   |
| used-CZ4-N700-Cr  | 36.4%                                       | 51.3%                                                   |
